# Supplementary material
Source: ML conference proceedings conference paper supplement (https://proceedings.neurips.cc/paper_files/paper/2019/hash/c1285fcadc52c0d3dc8813fc2c2e2b2a-Abstract.html)
Supplement: Supplementary file 1 [file c1285fcadc52c0d3dc8813fc2c2e2b2a-Supplemental.zip]

## A The Assouad and Fano Methods for Minimax Lower Bounds

In this precursor to the appendix, we review the Le Cam, Fano and Assouad methods [2, 29, 1, 27] for proving lower bounds for stochastic optimization. Each reduces estimation to testing then uses information theoretic tools to bound the probability of error in various hypothesis tests.

### A.1 Le Cam and Fano Methods

We start with a lemma that provides the standard reduction from estimation to testing that we extensively use in our proofs. This is essentially [12, Ex. 7.5]; we provide the proof for completeness.

**Lemma 1** (From estimation to testing). *Let  $\mathcal{P}$  be a collection of distributions over  $\mathcal{X}$  and  $L : \Theta \times \mathcal{P} \rightarrow \mathbf{R}_+$  satisfy*

$$\inf_{\theta \in \Theta} L(\theta, P) = 0 \text{ for } P \in \mathcal{P}.$$

*For distributions  $P, Q \in \mathcal{P}$ , define the separation*

$$\text{sep}_L(P, Q; \Theta) := \sup \left\{ \delta \geq 0 \mid \text{for all } \theta \in \Theta, \begin{array}{l} L(\theta, P) \leq \delta \text{ implies } L(\theta, Q) \geq \delta \\ L(\theta, Q) \leq \delta \text{ implies } L(\theta, P) \geq \delta \end{array} \right\}.$$

*Let  $\delta > 0$  and  $\{P_v\}_{v \in \mathcal{V}} \subset \mathcal{P}$  be a family of distributions indexed by a finite set  $\mathcal{V}$  satisfying the separation condition  $\text{sep}_L(P_v, P_{v'}; \Theta) \geq \delta$  for  $v \neq v' \in \mathcal{V}$ . Then for  $X_1^n \stackrel{\text{iid}}{\sim} P$ ,*

$$\inf_{\hat{\theta}} \sup_{P \in \mathcal{P}} \mathbf{E}_P L(\hat{\theta}(X_1^n), P) \geq \delta \inf_{\psi} \mathbb{P}(\psi(X_1^n) \neq V),$$

*where  $\mathbb{P}$  is the joint distribution over the random index  $V$  chosen uniformly in  $\mathcal{V}$  and  $X_1^n \stackrel{\text{iid}}{\sim} P_v$  conditional on  $V = v$ .*

*Proof.* Let  $V \sim \text{Uniform}(\mathcal{V})$  and  $X_1^n \mid (V = v) \stackrel{\text{iid}}{\sim} P_v$ . Then for any estimator  $\hat{\theta}$ , we have

$$\sup_{P \in \mathcal{P}} \mathbf{E}_P L(\hat{\theta}(X_1^n), P) \geq \frac{1}{|\mathcal{V}|} \sum_v \mathbf{E}_{P_v} L(\hat{\theta}, P_v) \geq \delta \frac{1}{|\mathcal{V}|} \sum_v \mathbb{P}_v(L(\hat{\theta}, P_v) \geq \delta) = \delta \mathbb{P}(L(\hat{\theta}(X_1^n), P_V) \geq \delta),$$

where  $\mathbb{P}$  denotes the joint distribution of  $X_1^n$  and  $V$ . Define the test  $\psi(x_1^n) := \text{argmin}_{v \in \mathcal{V}} L(\hat{\theta}(x_1^n), P_v)$ . The separation assumption guarantees that if  $\psi(\theta) \neq v$  then  $L(\theta, P_v) \geq \delta$ , so

$$\mathbb{P}(L(\hat{\theta}(X_1^n), P_V) \geq \delta) \geq \mathbb{P}(\psi(X_1^n) \neq V).$$

Taking the infimum over all tests  $\psi$  yields the result.  $\square$

With this, the classical Le Cam and Fano methods are straightforward combinations of Lemma 2 with (respectively) Le Cam's lemma [29, Lemma 1] and Fano's inequality [8, Theorem 2.10.1].

**Proposition 6** (Le Cam's method). *Let  $P_0$  and  $P_1$  be two distributions of  $\mathcal{P}$  over  $\mathcal{X}$ . Let  $\delta > 0$  be such that  $\text{sep}_L(P_0, P_1, \Theta) \geq \delta$ . Then*

$$\inf_{\hat{\theta}} \sup_{P \in \mathcal{P}} \mathbf{E}_P L(\hat{\theta}(X_1^n), P) \geq \frac{\delta}{2} (1 - \|P_0^n - P_1^n\|_{\text{tv}}).$$

**Proposition 7** (Fano's method). *Let  $\mathcal{V}$  be a finite index set and  $\{P_v\}_{v \in \mathcal{V}}$  a collection of distributions contained by  $\mathcal{P}$  such that  $\min_{v \neq v'} \text{sep}_L(P_v, P_{v'}, \Theta) \geq \delta$ , then*

$$\inf_{\hat{\theta}} \sup_{P \in \mathcal{P}} \mathbf{E}_P L(\hat{\theta}(X_1^n), P) \geq \delta \left( 1 - \frac{\mathbf{I}(X_1^n; V) + \log 2}{\log |\mathcal{V}|} \right).$$

With these tools, minimax lower bounds on the stochastic risk  $\mathfrak{M}_n^S$  in Section 2 follow by (i) demonstrating an appropriate loss  $L$  and (ii) separation. The next lemma, essentially present in the paper [1] (cf. [11]), reduces optimization to testing by providing an appropriate separation function.

**Lemma 2** (From optimization to function estimation). *Let  $\mathcal{X}$  be a sample space,  $\Theta \subset \mathbf{R}^d$ ,  $\mathcal{F}$  be a collection of functions  $\mathbf{R}^d \times \mathcal{X} \rightarrow \mathbf{R}$ , and  $\mathcal{P}$  be a collection of distributions over  $\mathcal{X}$ . Let  $\mathcal{V}$  index  $\{P_v\}_{v \in \mathcal{V}} \subset \mathcal{P}$ . For  $F \in \mathcal{F}$ , define  $f_v(\theta) := \mathbf{E}_{P_v}[F(\theta, X)]$  and for each  $v, v' \in \mathcal{V}$ , set*

$$d_{\text{opt}}(v, v', \Theta) := \inf_{\theta \in \Theta} \left\{ f_v(\theta) + f_{v'}(\theta) - \inf_{\theta \in \Theta} f_v(\theta) - \inf_{\theta \in \Theta} f_{v'}(\theta) \right\}.$$

*If  $d_{\text{opt}}(v, v', \Theta) \geq \delta \geq 0$  for all  $v \neq v' \in \mathcal{V}$ , then*

$$\mathfrak{M}_n^S(\Theta, \mathcal{F}) \geq \mathfrak{M}_n^S(\Theta, \mathcal{F}, \mathcal{P}) \geq \frac{\delta}{2} \inf_{\psi} \mathbb{P}(\psi(X_1^n) \neq V).$$

*Proof.* We construct an appropriate loss  $L$  and apply Lemma 1. Define  $L(\theta, P) := f_P(\theta) - \inf_{\theta \in \Theta} f_P(\theta)$ . By construction,  $L(\theta, P) \geq 0$  and  $\inf_{\theta \in \Theta} L(\theta, P) = 0$  for all  $\theta \in \Theta$  and  $P \in \mathcal{P}$ . Let  $v \neq v' \in \mathcal{V}$ . Then if  $L(\theta, P_v) = f_v(\theta) - \inf_{\theta \in \Theta} f_v(\theta) \leq \frac{1}{2} d_{\text{opt}}(v, v', \Theta)$ , it is evidently the case that  $f_{v'}(\theta) - \inf_{\theta \in \Theta} f_{v'}(\theta) \geq \frac{1}{2} d_{\text{opt}}(v, v', \Theta)$ , so that  $\text{sep}_L(P_v, P_{v'}, \Theta) \geq \frac{1}{2} d_{\text{opt}}(v, v', \Theta)$ . The distributions  $\{P_v\}_{v \in \mathcal{V}}$  are  $\delta/2$ -separated, allowing application of Lemma 1.  $\square$

Our general strategy for proving lower bounds on  $\mathfrak{M}_n^S$  is as follows:

- Choose a function  $F \in \mathcal{F}$  and define  $\mathcal{V}$  and  $\{P_v\}_{v \in \mathcal{V}} \subset \mathcal{P}$  such that  $d_{\text{opt}}(v, v', \Theta) \geq \delta > 0$ .
- Lower bound the testing error  $\inf_{\psi} \mathbb{P}(\psi(X_1^n) \neq V)$ , and choose the largest separation  $\delta$  to make this testing error a positive constant.

To showcase this proof technique, we prove that minimax stochastic risk for 1-dimensional optimization has lower bound  $1/\sqrt{n}$ ; we use this to address technicalities in later proofs.

**Lemma 3.** *Let  $\mathcal{F}^{d=1} = \{f : \mathbf{R} \times \mathcal{X} \rightarrow \mathbf{R} \mid f(\cdot, x) \text{ is convex and 1-Lipschitz}\}$ . Then*

$$\mathfrak{M}_n^S([-1, 1], \mathcal{F}^{d=1}) \geq \frac{1}{4\sqrt{6n}}.$$

*Proof.* Let  $\Theta = [-1, 1]$  and  $\mathcal{X} = \{\pm 1\}$ ,  $\mathcal{V} = \{\pm 1\}$ .

To see the separation condition, let  $F(\theta, x) := |\theta - x|$ . For  $\delta \in [0, \frac{1}{2}]$ , we define  $P_v$  s.t. if  $X \sim P_v$  we have

$$X = \begin{cases} 1 & \text{with probability } \frac{1+v\delta}{2} \\ -1 & \text{with probability } \frac{1-v\delta}{2} \end{cases}.$$

We have  $f_v(\theta) = \frac{1+\delta}{2}|\theta - v| + \frac{1-\delta}{2}|\theta + v|$  and  $\inf_{\theta} f_v(\theta) = \frac{1-\delta}{2}$ . To lower bound the separation, note that

$$f_1(\theta) + f_{-1}(\theta) - \inf_{\Theta} f_1 - \inf_{\Theta} f_{-1} = |\theta - 1| + |\theta + 1| - (1 - \delta) \geq \delta.$$

This yields  $d_{\text{opt}}(1, -1, \Theta) \geq \delta$ .

We lower bound the testing error via Proposition 6:

$$\inf_{\psi: \mathcal{X}^n \rightarrow \{\pm 1\}} \mathbb{P}(\psi(X_1^n) \neq V) = \frac{1}{2}(1 - \|P_1^n - P_{-1}^n\|_{\text{tv}}) \geq \frac{1}{2} \left( 1 - \sqrt{\frac{n}{2} D_{\text{kl}}(P_1 \| P_{-1})} \right),$$

where the rightmost inequality is Pinsker's inequality. Noting that  $D_{\text{kl}}(P_1 \| P_{-1}) = \delta \log \frac{1+\delta}{1-\delta} \leq 3\delta^2$  for  $\delta \in [0, \frac{1}{2}]$  and setting  $\delta = 1/\sqrt{6n}$  yields the result.  $\square$

## A.2 The Assouad Method

Assouad's method reduces the problem of estimation (or optimization) to one of multiple binary hypothesis tests. In this case, we index a set of distributions  $\mathcal{P} = \{P_v\}_{v \in \mathcal{V}}$  on a set  $\mathcal{X}$  by the hypercube  $\mathcal{V} = \{\pm 1\}^d$ . For a function  $F : \mathbf{R}^d \times \mathcal{X} \rightarrow \mathbf{R}$ , we define  $f_v(\theta) := \mathbf{E}_{P_v}[F(\theta, X)]$ . Then for a vector  $\delta \in \mathbf{R}_+^d$ , following Duchi [11, Lemma 5.3.2], we say that the functions  $\{f_v\}$  induce a  $\delta$ -separation in Hamming metric if

$$f_v(\theta) - \inf_{\theta \in \Theta} f_v(\theta) \geq \sum_{j=1}^d \delta_j 1(\text{sign}(\theta_j) \neq v_j). \quad (8)$$

With this condition, we have the following generalized Assouad method [11, Lemma 5.3.2].

**Lemma 4** (Generalized Assouad's method). *Let  $X_1^n \stackrel{\text{iid}}{\sim} P_V$ , where  $V \sim \text{Uniform}(\{\pm 1\}^d)$ . Define the averages*

$$\mathbb{P}_{+j} := \frac{1}{2^{d-1}} \sum_{v: v_j=1} P_v^n \text{ and } \mathbb{P}_{-j} := \frac{1}{2^{d-1}} \sum_{v: v_j=-1} P_v^n.$$

*Assume that the collection  $\{f_v\}$  for  $f_v = \mathbb{E}_{P_v}[F(\cdot, X)]$  induces a  $\delta$ -separation (8). Then letting  $\mathcal{F} = \{F\}$ , the single function  $F$ ,*

$$\mathfrak{M}_n^S(\Theta, \mathcal{F}, \mathcal{P}) \geq \frac{1}{2} \sum_{j=1}^d \delta_j (1 - \|\mathbb{P}_{+j} - \mathbb{P}_{-j}\|_{\text{TV}}).$$

## B Proofs for Section 3.1

### B.1 Proof of Proposition 1

We use the general information-theoretic framework of reduction from estimation to testing presented in Section A.1 to prove the lower bound.

**Separation** Let us consider the sample space  $\mathcal{X} = \{\pm e_j\}_{j \leq d}$  and the function  $F(\theta, x) := \theta^\top x$ ;  $F$  belongs to  $\mathcal{F}^{\gamma, 1}$ . Let  $\delta \in [0, 1/2]$ , for  $v \in \{\pm 1\}^d$ , we define  $P_v$  such that for  $X \sim P_v$  we have

$$X = \begin{cases} v_j e_j & \text{with probability } \frac{1+\delta}{2d} \\ -v_j e_j & \text{with probability } \frac{1-\delta}{2d}. \end{cases}$$

We then have  $f_v(\theta) = \frac{\delta}{d} \theta^\top v$ . By duality,

$$f_v^* := \inf_{\Theta} f_v = -\frac{\delta}{d} \sup_{\theta \in \mathbf{B}_p(0,1)} v^\top \theta = -\frac{\delta}{d} \|v\|_{p^*},$$

where  $p^*$  is such that  $1/p + 1/p^* = 1$ . For  $v, v' \in \{\pm 1\}^d$ , we thus have:

$$\begin{aligned} \mathbf{d}_{\text{opt}}(v, v', \Theta) &= \inf_{\theta \in \Theta} f_v(\theta) + f_{v'}(\theta) - f_v^* - f_{v'}^* = \inf_{\theta \in \mathbf{B}_p(0,1)} \frac{\delta}{d} (\theta^\top (v + v') + \|v\|_{p^*} + \|v'\|_{p^*}) \\ &= \frac{\delta}{d} (\|v\|_{p^*} + \|v'\|_{p^*} - \|v + v'\|_{p^*}) \\ &= 2 \frac{\delta}{d} \left[ d^{1/p^*} - (d - \mathbf{d}_{\text{Ham}}(v, v'))^{1/p^*} \right], \end{aligned}$$

where  $\mathbf{d}_{\text{Ham}}(v, v')$  is the Hamming distance between  $v$  and  $v'$ . The Gilbert-Varshimov bound [12, Lemma 7.5] guarantees the existence of a  $d/2$   $\ell_1$ -packing of  $\{\pm 1\}^d$  of size at least  $\exp(d/8)$ . Let  $\mathcal{V}$  be such a packing; we have that, for a numerical constant  $c_0 > 0$ :

$$\forall v \neq v' \in \mathcal{V}, \mathbf{d}_{\text{opt}}(v, v', \Theta) \geq c_0 \delta d^{-1/p}. \quad (9)$$

Applying Lemma 2 yields

$$\mathfrak{M}_n^S(\Theta, \gamma) \geq \frac{c_0}{2} \delta d^{-1/p} \inf_{\psi} \mathbb{P}(\psi(X_1^n) \neq V).$$

**Bounding the testing error** We bound the testing error with Fano's inequality and upper bounding the mutual information  $I(X; V)$ . Using the identity  $\delta \log \frac{1+\delta}{1-\delta} \leq 3\delta^2$ , it holds

$$I(X_1^n; V) \leq n \max_{v, v'} D_{\text{kl}}(P_v \| P_{v'}) \leq 3n\delta^2,$$

and, recalling that  $\log |\mathcal{V}| \geq d/8$  yields

$$\inf_{\psi} \mathbb{P}(\psi(X_1^n) \neq V) \geq \left( 1 - \frac{3n\delta^2 + \log 2}{d/8} \right).$$

In the case that  $d \geq 32 \log 2$ , choosing  $\delta = \sqrt{\frac{d}{48n}}$  yields the desired lower-bound. In the case that  $d < 32 \log 2$ , with  $\mathcal{F}^{d=1}$  as in Lemma 3, that any 1-dimensional optimization problem may be embedded into a  $d$ -dimensional problem yields

$$\mathfrak{M}_n^S(\Theta, \gamma) \geq \mathfrak{M}_n^S([-1, 1], \mathcal{F}^{d=1}) \gtrsim \frac{1}{\sqrt{n}}.$$

This gives the lower bound for all  $d \in \mathbb{N}$ .

To conclude the proof, we establish an upper bound on the minimax regret. We consider the regret guarantee of (5) for  $h(\theta) = \frac{1}{2}\|\theta\|_2^2$ . Since  $p \geq 2$ , it holds that for all  $\theta \in \mathbf{R}^d$ ,  $\|\theta\|_2 \leq d^{\frac{1}{2}-\frac{1}{p}}\|\theta\|_p$  and thus  $\sup_{\theta, \theta' \in \Theta} D_h(\theta, \theta') \leq d^{\frac{1}{2}-\frac{1}{p}}$ . On the other hand, since  $r \in [1, 2]$ ,  $\|g\|_2 \leq \|g\|_r \leq 1$ . A straightforward optimization of the stepsize  $\alpha$  yields the upper bound on  $\mathfrak{M}_n^R(\Theta, \gamma)$ .  $\square$

## B.2 Proof of Proposition 2

The proof is very similar to Proposition 1 so we forego some of the details.

**Separation** We consider  $\mathcal{X} = \{\pm 1\}^d$  and  $F(\theta, x) := \eta \theta^\top x$ —we will decide the value of  $\eta$  later in the proof. For  $v \in \{\pm 1\}^d$ , we define  $P_v$  such that for  $X \sim P_v$  we have

$$X_j = \begin{cases} v_j & \text{with probability } \frac{1+\delta}{2} \\ -v_j & \text{with probability } \frac{1-\delta}{2}. \end{cases}$$

This yields  $f_v(\theta) = \eta \delta \theta^\top v$ . Considering again the Gilbert-Varshimov packing  $\mathcal{V} \subset \{\pm 1\}^d$ , we lower bound the separation

$$\text{for all } v \neq v' \in \mathcal{V}, d_{\text{opt}}(v, v', \Theta) = \inf_{\theta \in \Theta} f_v(\theta) + f_{v'}(\theta) - f_v^* - f_{v'}^* \geq c_0 \eta \delta d^{1/p^*}.$$

**Bounding the testing error** Noting that

$$D_{\text{kl}}(P_v \| P_{v'}) = \sum_{j \leq d} \mathbf{1}_{v_j \neq v'_j} \delta \log \frac{1+\delta}{1-\delta} \leq 3d\delta^2,$$

and have  $I(X_1^n; V) \leq 3nd\delta^2$ . For  $F$  to remain in  $\mathcal{F}^{\gamma, 1}$ , we must have that for all  $x \in \mathcal{X}$ ,  $\eta \|x\|_r \leq 1$ ; noting that  $\|x\|_r = d^{1/q}$ , we choose  $\eta = d^{-1/q}$ . In the case that  $d \geq 32 \log 2$ , choosing  $\delta = 1/\sqrt{48n}$  yields the minimax lower-bound

$$\mathfrak{M}_n^S(\Theta, \gamma) \gtrsim \frac{d^{\frac{1}{p^*}} d^{-\frac{1}{q}}}{\sqrt{n}} = \frac{d^{\frac{1}{2}-\frac{1}{p}} d^{\frac{1}{2}-\frac{1}{q}}}{\sqrt{n}}.$$

In the case that  $d < 32 \log 2$ , we once again refer Lemma 3, which concludes the proof for the lower bound on the minimax stochastic risk.

For the upper bound, we turn to (5), with  $h(\theta) = \frac{1}{2}\|\theta\|_2^2$ . It holds again that  $\sup_{\theta, \theta' \in \Theta} D_h(\theta, \theta') \leq d^{1/2-1/p}$ . Since  $r \geq 2$ , we have that  $\sup_{\|g\|_r \leq 1} \|g\|_2 = d^{\frac{1}{2}-\frac{1}{r}}$  and choosing the stepsize  $\alpha$  to optimize (5) yields the upper bound on the minimax regret.  $\square$

## C Proofs for Section 3.2

### C.1 Proof of Theorem 1

For the upper bound, we use Corollary 1. Because  $\mathbf{B}_\gamma(0, 1)$  is quadratically convex, we have  $\text{QHull}(\mathbf{B}_\gamma(0, 1)) = \mathbf{B}_\gamma(0, 1)$ , so that  $\sup_{g \in \text{QHull}(\mathbf{B}_\gamma(0, 1))} \theta^\top g = \gamma^*(\theta)$ , giving the upper bound. The lower bound uses Proposition 3. Define the hyperrectangle  $\text{Rec}(\theta) := \prod_{j \leq d} [-|\theta_j|, |\theta_j|]$ , so that, by orthosymmetry of  $\Theta$ ,  $\Theta \supset \text{Rec}(\theta)$  for all  $\theta \in \Theta$ . Additionally, recalling the notation (3) of  $\mathcal{F}^{\gamma, 1}$  and  $\mathcal{F}^M$ , if  $M \in \mathbf{R}_+^d$  satisfies  $\gamma(M) \leq 1$  then, by orthosymmetry of  $\gamma$ ,  $\mathcal{F}^{\gamma, 1} \supset \mathcal{F}^M$ . Thus

$$\mathfrak{M}_n^S(\Theta, \gamma) \geq \mathfrak{M}_n^S(\text{Rec}(\theta), \gamma) \geq \mathfrak{M}_n^S(\text{Rec}(\theta), \mathcal{F}^M) \geq \frac{1}{8\sqrt{n} \log 3} \sum_{j \leq d} |\theta_j| M_j$$

for all  $M \in \mathbf{B}_\gamma(0, 1) \cap \mathbf{R}_+^d$  and  $\theta \in \Theta$ . Taking a supremum over  $M \in \mathbf{B}_\gamma(0, 1)$  and  $\theta \in \Theta$ , we have

$$\mathfrak{M}_n^S(\Theta, \gamma) \geq \frac{1}{8\sqrt{n \log 3}} \sup_{\theta \in \Theta} \sup_{\gamma(M) \leq 1} \theta^\top M = \frac{1}{8\sqrt{n \log 3}} \sup_{\theta \in \Theta} \gamma^*(\theta).$$

□

## C.2 Proof of Theorem 2

The upper bound is simply Corollary 1. For the lower bound, similar to our warm-up in Section 3.1, we consider “sparse” gradients, though instead of using Fano’s method we use Assouad’s method to more carefully relate the geometry of the norm  $\gamma$  and constraint set  $\Theta$ .

Let  $a$  be such that  $\text{Rec}(a) \subset \Theta$ . We consider the sample space  $\mathcal{X} := \{\pm e_j\}_{j \leq d}$  and functions

$$F(\theta, x) := \sum_{j \leq d} \frac{1}{\gamma(e_j)} |x_j| |\theta_j - a_j x_j|.$$

For any  $x \in \mathcal{X}$ , the subdifferential  $\partial_\theta F(\theta, x)$  has at most one non-zero coordinate; the orthosymmetry of  $\gamma$  implies  $F \in \mathcal{F}^{\gamma, 1}$ . Let  $p \in \mathbf{R}_+^d$  (to be specified presently) be such that  $\mathbf{1}^\top p = 1$  and for  $1 \leq j \leq d$ , let  $\delta_j \in [0, 1/2]$ . We define the distributions  $P_v$  on  $\mathcal{X}$  by

$$X = \begin{cases} v_j e_j & \text{with probability } \frac{p_j(1+\delta_j)}{2} \\ -v_j e_j & \text{with probability } \frac{p_j(1-\delta_j)}{2}. \end{cases}$$

With this choice, we evidently have

$$f_v(\theta) = \mathbf{E}_{X \sim P_v} F(\theta, X) = \sum_{j \leq d} \frac{p_j}{\gamma(e_j)} \left[ \frac{1+\delta_j}{2} |\theta_j - a_j v_j| + \frac{1-\delta_j}{2} |\theta_j + a_j v_j| \right]$$

and immediately that  $\inf_\Theta f_v = \sum_{j \leq d} \frac{p_j a_j}{\gamma(e_j)} (1 - \delta_j)$ . As a consequence, we have the Hamming separation (recall Eq. (8))

$$f_v(\theta) - \inf_\Theta f_v = \sum_{j \leq d} \frac{p_j a_j \delta_j}{\gamma(e_j)} \mathbf{1}_{\text{sign}(\theta_j) \neq v_j},$$

which allows us to apply Assouad’s method via Lemma 4.

Using the same notation as Lemma 4, we have

$$\|\mathbb{P}_{+j}^n - \mathbb{P}_{-j}^n\|_{\text{tv}}^2 \leq \frac{1}{2} D_{\text{kl}}(\mathbb{P}_{+j}^n \|\mathbb{P}_{-j}^n) \leq \log 3 \cdot n p_j \delta_j^2.$$

Choosing  $\delta_j = \min\{\frac{1}{2}, \frac{1}{2\sqrt{n p_j \log(3)}}\}$  yields the lower bound

$$\mathfrak{M}_n^S(\Theta, \gamma) \geq \frac{1}{8} \sum_{j \leq d} \frac{a_j}{\gamma(e_j)} \min \left\{ p_j, \frac{\sqrt{p_j}}{\sqrt{n \log 3}} \right\},$$

and by taking  $p_j = (\frac{a_j}{\gamma(e_j)})^2 / \|a/\gamma(e.)\|_2^2$ , we obtain for any  $a \in \Theta$  that

$$\begin{aligned} \mathfrak{M}_n^S(\Theta, \gamma) &\geq \mathfrak{M}_n^S(\text{Rec}(a), \gamma) \geq \frac{1}{8} \sum_{j \leq d} \frac{a_j}{\gamma(e_j)} \min \left\{ \frac{a_j^2}{\gamma(e_j)^2 \|a/\gamma(e.)\|_2^2}, \frac{1}{\sqrt{n \log 3}} \frac{a_j}{\gamma(e_j) \|a/\gamma(e.)\|_2} \right\} \\ &= \frac{1}{8 \|a/\gamma(e.)\|_2^2} \sum_{j=1}^d \frac{a_j^2}{\gamma(e_j)^2} \min \left\{ \frac{a_j}{\gamma(e_j)}, \frac{\|a/\gamma(e.)\|_2}{\sqrt{n \log 3}} \right\}. \end{aligned}$$

For notational simplicity, define the set  $T := \{\theta/\gamma(e.) \mid \theta \in \Theta\}$ , which is evidently orthosymmetric and convex (it is a diagonal scaling of  $\Theta$ ). Then

$$\mathfrak{M}_n^S(\Theta, \gamma) \geq \sup_{u \in T} \frac{1}{8 \|u\|_2^2} \sum_{j=1}^d u_j^2 \min \left\{ u_j, \frac{\|u\|_2}{\sqrt{n \log 3}} \right\}. \quad (10)$$

For any vector  $u \in \mathbf{R}_+^d$  and  $c < 1$ , if we define  $J = \{j \in [d] \mid u_j \geq \frac{c}{\sqrt{d}} \|u\|_2\}$ , then

$$\|u\|_2^2 = \|u_J\|_2^2 + \|u_{J^c}\|_2^2 \leq \|u_J\|_2^2 + \|u\|_2^2 \sum_{j \in J^c} \frac{c^2}{d} \leq \|u_J\|_2^2 + c^2 \|u\|_2^2, \text{ i.e. } \|u_J\|_2 \geq \sqrt{1 - c^2} \|u\|_2.$$

Now, fix  $k \in \mathbf{N}$ . If in the supremum (10) we consider any vector  $u \in T$ ,  $u \geq 0$  satisfying  $\|u\|_0 \leq k$ , then setting the index set  $J = \{j : u_j \geq \|u\|_2 / \sqrt{n \log 3}\} = \{j : u_j \geq \|u\|_2 / \sqrt{k(n/k) \log 3}\}$  we have

$$\mathfrak{M}_n^S(\Theta, \gamma) \geq \frac{1}{8 \|u\|_2^2} \sum_{j=1}^d u_j^2 \min \left\{ u_j, \frac{\|u\|_2}{\sqrt{n \log 3}} \right\} \geq \frac{1}{8 \|u\|_2^2} \sum_{j \in J} u_j^2 \frac{\|u\|_2}{\sqrt{n \log 3}} \geq \frac{1}{8} \left( 1 - \frac{k}{n \log 3} \right) \frac{\|u\|_2}{\sqrt{n \log 3}}.$$

Taking a supremum over  $u$  with  $\|u\|_0 \leq k$  gives the theorem.

### C.3 Proof of Corollary 2

Given proof of Theorem 2, the proof is nearly immediate. Let  $p \in [1, 2]$ ,  $\beta \in (\mathbf{R}_+ \setminus \{0\})^d$  and  $\gamma(v) = \|\beta \odot v\|_p$ . For the lower bound, the final display of the proof of Theorem 2 above guarantees the lower bound  $\mathfrak{M}_n^S(\Theta, \gamma) \geq \frac{1}{16} \|u\|_2 / \sqrt{n}$  for all  $u \in \{\theta / \gamma(e.) \mid \theta \in \Theta\}$  and  $n \geq 2d$ . We first observe that  $\text{QHull}(\mathbf{B}_\gamma(0, 1)) = \{v, \|\beta \odot v\|_2 \leq 1\}$ . Thus, the upper bound in Theorem 2 is

$$\mathfrak{M}_n^R(\Theta, \gamma) \leq \frac{1}{\sqrt{n}} \sup_{\theta \in \Theta} \sup_{g: \|\beta \odot g\|_2 \leq 1} \theta^\top g.$$

Using

$$\sup_{g: \|\beta \odot g\|_2 \leq 1} u^\top g = \sup_{z: \|z\|_2 \leq 1} u^\top (z/\beta) = \|u/\beta\|_2,$$

and recalling  $\beta_j = \gamma(e_j)$  concludes the proof.  $\square$

### C.4 Proof of Corollary 3

There is a bijective mapping between  $\mathcal{F}$  and  $\mathcal{F}^{\gamma, 1}$ : for  $F \in \mathcal{F}$ ,  $\theta_0 \in \Theta_0$ , and  $x \in \mathcal{X}$ , we define  $\tilde{F}(\theta_0, x) := F(U\theta_0, x)$ .  $\text{dom } \tilde{F} \supset \Theta_0$  and its subdifferential is [16, Thm. 4.2.1]

$$\partial_\theta \tilde{F}(\theta_0, x) = U^\top \partial_\theta F(U\theta_0, x).$$

Since  $\tilde{F}$  falls within the scope of Theorems 1 or Corollary 2, there exists a diagonal re-scaling  $\Lambda^*$  that achieves the optimal rate. We conclude the proof by observing that a diagonally re-scaled stochastic gradient update on  $\tilde{F}$  corresponds to the update  $\theta_{i+1} = \theta_i - U\Lambda^*U^\top g_i$  where  $g_i \in \partial_\theta F(\theta_i, X_i)$ .

## D Proofs for Section 4

### D.1 Proof of Theorem 3

Let us tackle the first case stated in the theorem; we reduce the second case to the first one by scaling the dimension.

#### D.1.1 Case $1 \leq p \leq 1 + 1/\log(2d)$

We always have the lower bound  $1/\sqrt{n}$  by Lemma 3 by reducing to a lower-dimensional problem, so we assume without loss of generality that  $d \geq 8$ .

**Separation** Let us consider  $\mathcal{V} = \{\pm e_j\}_{j \leq d}$ . For  $v = \pm e_j \in \mathcal{V}$ , we define  $P_v$  on  $X \in \{\pm 1\}^d$  by choosing coordinates of  $X$  independently via

$$X_j = \begin{cases} 1 & \text{with probability } \frac{1+\delta v_j}{2} \\ -1 & \text{with probability } \frac{1-\delta v_j}{2}. \end{cases}$$

Immediately, we have  $\mathbf{E}_{P_v} X = \delta v$ . For  $x \in \{\pm 1\}^d$ , we define  $F(\theta, x) := d^{-1/p^*} \theta^\top x$ , so  $F \in \mathcal{F}^{\gamma, 1}$ ,  $f_v(\theta) = \mathbf{E}_{P_v} F(\theta, X) = \delta d^{-1/p^*} \theta^\top v$ , and a calculation gives that  $f_v^* := \inf_{\Theta} f_v = -\delta d^{-1/p^*}$ . For  $v \neq v' \in \mathcal{V}$ , we have

$$\begin{aligned} d_{\text{opt}}(v, v', \Theta) &= \inf_{\theta \in \Theta} f_v(\theta) + f_{v'}(\theta) - f_v^* - f_{v'}^* = d^{-1/p^*} \delta \inf_{\theta \in \Theta} ((v + v')^\top \theta + 2) \\ &= \delta d^{-1/p^*} (2 - \|v + v'\|_{p^*}) \\ &\geq (2 - \sqrt{2}) \delta d^{-1/p^*}. \end{aligned}$$

Lemma 2 yields

$$\mathfrak{M}_n^S(\Theta, \gamma) \geq \frac{2 - \sqrt{2}}{2} \delta d^{-1/p^*} \inf_{\psi: \mathcal{X}^n \rightarrow \mathcal{V}} \mathbb{P}(\psi(X_1^n) \neq V).$$

It now remains to bound the testing error.

**Bounding the testing error** Noting that  $|\mathcal{V}| = \log(2d)$ , we lower bound the testing error via Fano's inequality

$$\inf_{\psi: \mathcal{X}^n \rightarrow \mathcal{V}} \mathbb{P}(\psi(X_1^n) \neq V) \geq \left(1 - \frac{\mathbf{I}(X_1^n; V) + \log 2}{\log(2d)}\right).$$

For any  $v \neq v' \in \mathcal{V}$ , we have for  $\delta \in [0, \frac{1}{2}]$  that

$$D_{\text{kl}}(P_v \| P_{v'}) = \delta \log \frac{1 + \delta}{1 - \delta} \leq 3\delta^2.$$

We can thus bound the mutual information between  $X_1^n$  and  $V$

$$\mathbf{I}(X_1^n; V) \leq n \max_{v \neq v'} D_{\text{kl}}(P_v \| P_{v'}) \leq 3n\delta^2.$$

In the case that  $d < 8$ , the lower bound holds trivially via Lemma 3. In the case that  $d \geq 8$ , assuming that choosing  $\delta^2 = \frac{\log(2d)}{6n} \wedge \frac{1}{2}$  yields

$$\mathfrak{M}_n^S(\Theta, \gamma) \geq \frac{2 - \sqrt{2}}{2} d^{-1/p^*} \min \left\{ \sqrt{\frac{\log(2d)}{6n}}, \frac{1}{2} \right\} \left(1 - \frac{1}{2} - \frac{1}{4}\right), \quad (11)$$

which is valid for all  $p \in [1, 2]$ . In the case that  $1 \leq p \leq 1 + 1/\log(2d)$ , we note that  $d^{-1/p^*} = 1/d^{\frac{p-1}{p}} \geq 1/e$ , which yields

$$\mathfrak{M}_n^S(\Theta, \gamma) \geq c \cdot \sqrt{\frac{\log(2d)}{n}} \wedge 1$$

for a numerical constant  $c_0 > 0$ .

To conclude, we need to establish the upper bound. Let us choose  $a = 1 + 1/\log(2d)$ ,  $\frac{\sup_{\theta \in \Theta} \|\theta\|_a \sup_{g \in \mathbf{B}_{\gamma}(0,1)} \|g\|_{a^*}}{\sqrt{a-1}\sqrt{n}}$  upper bounds the minimax regret. Since  $a > p$ ,  $\sup_{\theta \in \Theta} \|\theta\|_a = 1$ .

We have  $a^* = \log(2d) + 1$  and  $p^* \geq a^*$ . We have

$$\|g\|_{a^*} \leq d^{\frac{1}{a^*} - \frac{1}{p^*}} \|g\|_{p^*} \leq d^{\frac{1}{a^*}},$$

because  $g \in \mathbf{B}_{p^*}(0, 1)$ . We note that  $d^{1/a^*} = \exp\left(\frac{\log d}{\log(2d)+1}\right) \leq e$ . Noting that  $1/\sqrt{2(a-1)} = \sqrt{\log(2d)/2}$  concludes this case.  $\square$

### D.1.2 Case $1 + 1/\log(2d) < p \leq 2$

Let  $d_0 \leq d$ . We can embed a function  $F_{d_0} : \mathbf{R}^{d_0} \times \mathcal{X} \rightarrow \mathbf{R}$  as a function  $F : \mathbf{R}^d \times \mathcal{X} \rightarrow \mathbf{R}$  by letting  $\pi_{d_0}$  denote the projection onto the first  $d_0$ -components, and defining

$$F(\theta, x) = F_{d_0}(\pi_{d_0} \theta, x).$$

If the subgradients of  $F_{d_0}$  lie in  $\mathbf{B}_{p^*}(0, 1)$ , so do those of  $F$ . Similarly, if  $\theta_0 \in \{\tau \in \mathbf{R}^{d_0}, \|\tau\|_p \leq 1\}$  then  $\theta = (\theta_0, \mathbf{0}_{d_0+1:d}) \in \mathbf{B}_p(0, 1)$ . As such, any lower bound for the  $d_0$ -dimensional problem implies an identical one for all  $d \geq d_0$ -dimensional problems. For  $1 + 1/\log(2d) < p \leq 2$ , let us

define  $d_0 = \lceil 1/2 \exp(\frac{1}{p-1}) \rceil$ , so  $d_0 \leq d$  as desired. In the case that  $p > 1 + 1/\log 16$ , Lemma 3 yields the desired lower bound. In the case that  $p \leq 1 + 1/\log 16$ , we have that  $d_0 \geq 8$ , and the lower bound (11) holds so that for a numerical constant  $c > 0$ ,

$$\mathfrak{M}_n^S(\Theta, \gamma) \geq cd_0^{-1/p^*} \cdot \sqrt{\frac{\log(2d_0)}{n}} \wedge 1.$$

We have that  $d_0^{-1/p^*} \geq (1/2)^{\frac{1}{p}-1} \exp(-1/p) \geq \sqrt{2/e}$ . This yields the final lower bound

$$\mathfrak{M}_n^S(\Theta, \gamma) \geq c \cdot \frac{1}{\sqrt{2(p-1)n}} \wedge 1.$$

Proposition 5 yields the upper bound and concludes this proof.  $\square$

## D.2 Proof of Theorem 4

Let  $A \succ 0$  be a positive semi-definite matrix for the distance generating function  $h_A(\theta) = \frac{1}{2}\theta^\top A\theta$  defined above, and let  $q = \frac{p}{p-1}$  be the conjugate to  $p$ . We choose linear functions  $F_i(\theta) := g_i^\top \theta$  where  $g_i \in \mathbf{B}_q(0, 1)$ . In this case, letting  $\{\theta_i\}_{i \leq n}$  be the points mirror descent plays, the regret with respect to  $\theta \in \mathbf{R}^d$  is

$$\text{Regret}_{n,A}(\theta) = \sum_{i \leq n} F_i(\theta_i) - F_i(\theta) = \sum_{i \leq n} g_i^\top (\theta_i - \theta),$$

so that

$$\text{Regret}_{n,A}^* := \sup_{\|\theta\|_p \leq 1} \text{Regret}_{n,A}(\theta) = \left\| \sum_{i \leq n} g_i \right\|_q + \frac{1}{2} \sum_{i \leq n} \|g_i\|_{A^{-1}}^2 - \frac{1}{2} \left\| \sum_{i \leq n} g_i \right\|_{A^{-1}}^2.$$

Now, we choose linear functions  $f_i$  so that the regret is large. To do so, choose vectors

$$u \in \underset{\|x\|_q \leq 1}{\text{argmax}} x^\top A^{-1}x \text{ and } v \in \underset{\|x\|_q = 1}{\text{argmin}} x^\top A^{-1}x. \quad (12)$$

Now, we choose the vectors  $g_i \in \mathbf{R}^d$  so that for a  $\delta \in [0, 1]$  to be chosen,

- (a)  $g_i = u$  for  $n/4$  of the indices  $i \in [n]$
- (b)  $g_i = -u$  for  $n/4$  of the indices  $i \in [n]$
- (c)  $g_i = v$  for  $\frac{n}{4}(1 + \delta)n$  of the indices  $i \in [n]$
- (d)  $g_i = -v$  for  $\frac{n}{4}(1 - \delta)$  of the indices  $i \in [n]$ .

With these choices, we obtain the regret lower bound

$$\begin{aligned} \text{Regret}_{n,A}^* &\geq \sup_{\delta \leq 1} \left[ \frac{n}{2} \delta \|v\|_q + \frac{n}{4} u^\top A^{-1}u - \frac{\delta^2 n^2}{8} v^\top A^{-1}v \right] \\ &\geq \frac{n}{4} \cdot \left[ u^\top A^{-1}u + \min \left\{ 1, \frac{2\|v\|_q}{nv^\top A^{-1}v} \right\} \|v\|_q \right]. \end{aligned} \quad (13)$$

We now consider two cases. In the first,  $A$  is large enough that  $\|v\|_q \geq \frac{1}{2}nv^\top A^{-1}v$ . Then the regret bound (13) becomes

$$\text{Regret}_{n,A}^* \geq \frac{n}{4} \left[ u^\top A^{-1}u + \|v\|_q \right] \geq \frac{n}{4},$$

as  $\|v\|_q = 1$  by the construction (12). This gives the first result of the theorem. For the second claim, which holds in the case that  $\|v\|_q < \frac{1}{2}nv^\top A^{-1}v$ , we consider the operator norms of general invertible linear operators. For a mapping  $T : \mathbf{R}^d \rightarrow \mathbf{R}^d$ , define the  $\ell_p$  to  $\ell_q$  operator norm

$$\|T\|_{\ell_p \rightarrow \ell_q} := \sup_{x \neq 0} \frac{\|T(x)\|_q}{\|x\|_p}.$$



Then the construction (12) evidently yields

$$u^\top A^{-1}u = \|A^{-1/2}\|_{\ell_q \rightarrow \ell_2}^2 \quad \text{and} \quad \frac{\|v\|_q^2}{v^\top A^{-1}v} = \sup_{x \neq 0} \frac{\|A^{1/2}x\|_q^2}{\|x\|_2^2} = \|A^{1/2}\|_{\ell_2 \rightarrow \ell_q}^2.$$

Revisiting the regret (13), we obtain

$$\text{Regret}_{n,A}^* \geq \frac{n}{4} \cdot \left[ \|A^{-1/2}\|_{\ell_q \rightarrow \ell_2}^2 + \frac{2}{n} \|A^{1/2}\|_{\ell_2 \rightarrow \ell_q}^2 \right] \geq \sqrt{\frac{n}{2}} \|A^{-1/2}\|_{\ell_q \rightarrow \ell_2} \|A^{1/2}\|_{\ell_2 \rightarrow \ell_q},$$

where we have used that  $ab \leq \frac{1}{2}a^2 + \frac{1}{2}b^2$  for all  $a, b$ . But for any invertible linear operator, standard results on the Banach-Mazur distance [26, Corollary 2.3.2] imply that

$$\inf_{A \succ 0} \|A\|_{\ell_2 \rightarrow \ell_q} \|A^{-1}\|_{\ell_q \rightarrow \ell_2} \geq d^{1/2-1/q}.$$

This gives the result.  $\square$

## E Proof of Theorem 5

The proof follows similar lines as the one we show in Appendix D.2 but choosing different  $u, v \in \mathbf{R}^d$ . Let  $\alpha \geq 0$  be a stepsize. We consider linear functions  $F_i(\theta) := g_i^\top \theta$  with  $\|\beta \odot g_i\|_1 \leq 1$ . Let  $\{\theta_i\}_{i \leq n}$  be the iterates of online gradient descent. The regret with respect to  $\theta \in \mathbf{R}^d$  is

$$\text{Regret}_{n,\alpha}(\theta) = \sum_{i \leq n} g_i^\top (\theta_i - \theta).$$

This yields

$$\text{Regret}_{n,\alpha}^* = \sup_{\|\theta\|_\infty \leq 1} \text{Regret}_{n,\alpha}(\theta) = \left\| \sum_{i \leq n} g_i \right\|_1 + \frac{\alpha}{2} \sum_{i \leq n} \|g_i\|_2^2 - \frac{\alpha}{2} \left\| \sum_{i \leq n} g_i \right\|_2^2.$$

Let  $k = \arg \min_{j \leq d} \beta_j$ , we choose

$$u = e_k / \beta_k \quad \text{and} \quad v = \frac{\mathbf{1}}{\|\beta\|_1}.$$

For  $\delta \in [0, 1]$ , we now choose the vectors  $g_i \in \mathbf{R}^d$  as follows:

- (a)  $g_i = u$  for  $n/4$  of the indices  $i \in [n]$ .
- (b)  $g_i = -u$  for  $n/4$  of the indices  $i \in [n]$ .
- (c)  $g_i = v$  for  $\frac{n}{4}(1 + \delta)$  of the indices  $i \in [n]$ .
- (d)  $g_i = -v$  for  $\frac{n}{4}(1 - \delta)$  of the indices  $i \in [n]$ .

For this construction, we lower bound the regret

$$\begin{aligned} \text{Regret}_{n,\alpha}^* &\geq \sup_{0 \leq \delta \leq 1} \left\{ \frac{n\delta}{2} \|v\|_1 + \frac{n\alpha}{4} \|u\|_2^2 - \frac{\alpha\delta^2 n^2}{8} \|v\|_2^2 \right\} \\ &\geq \frac{n\alpha}{4} \|u\|_2^2 + \frac{n\|v\|_1}{4} \min \left\{ 1, \frac{2\|v\|_1}{n\alpha\|v\|_2^2} \right\}. \end{aligned} \tag{14}$$

If the stepsize is too small (i.e.  $\alpha \leq \frac{2\|v\|_1}{n\|v\|_2^2}$ ) then (14) becomes

$$\text{Regret}_{n,\alpha}^* \geq \frac{nd}{4\|\beta\|_1}.$$

In the other case that  $\alpha > \frac{2\|v\|_1}{n\|v\|_2^2}$ , (14) yields

$$\text{Regret}_{n,\alpha}^* \geq \frac{n}{4\alpha} \|u\|_2^2 + \frac{\|v\|_1^2 \alpha}{\|v\|_2^2 2} \geq \frac{\sqrt{2}}{2} \frac{\sqrt{nd}}{\min_{j \leq d} \beta_j},$$

which is the desired result.  $\square$
