# Supplementary material
Source: ML conference proceedings conference paper supplement (https://proceedings.neurips.cc/paper_files/paper/2019/hash/c1285fcadc52c0d3dc8813fc2c2e2b2a-Abstract.html)
Supplement: Supplementary file 2 [file c1285fcadc52c0d3dc8813fc2c2e2b2a-Supplemental.zip]

Archive with 1 entries (1 files):
- neurips_supplemental.pdf
